# Supplementary material for: TLR7‐let‐7 Signaling Contributes to Ethanol‐Induced Hepatic Inflammatory Response in Mice and in Alcoholic Hepatitis
Source: PubMed Central journal article supplement — Alcohol Clin Exp Res. 2018 Sep 10;42(11):2107–22. doi: 10.1111/acer.13871 (PMC6282707; doi:10.1111/acer.13871), 2018-09-10
Supplement: ACER-42-2107-s001.pdf [file ACER-42-2107-s001.pdf]

# Supplemental Figure 1

## H&E staining

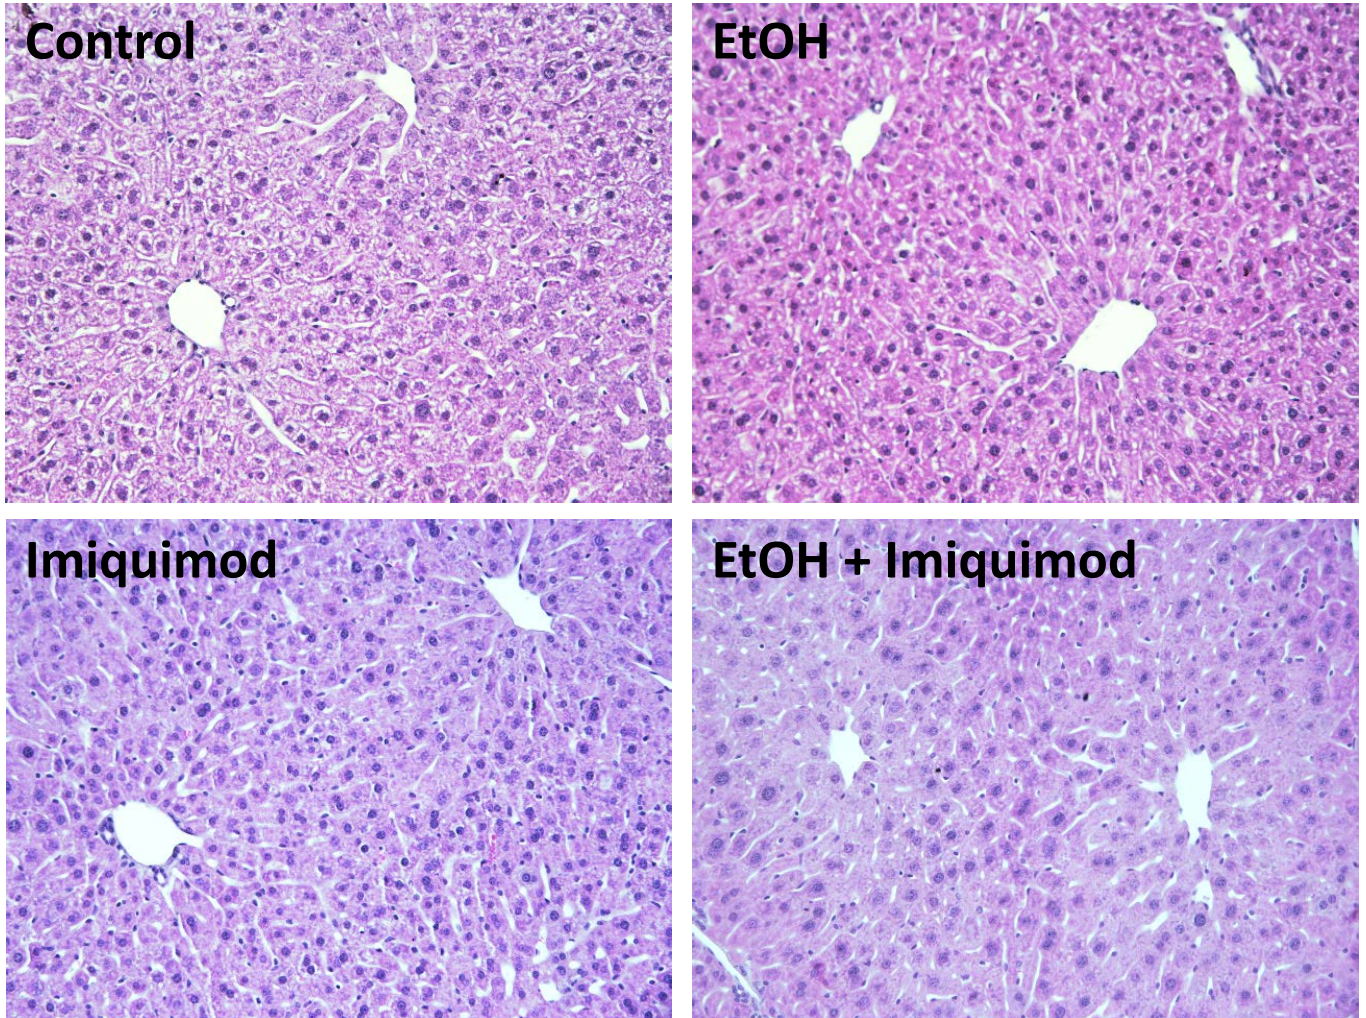

Supplemental Figure 1. Effect of ethanol and imiquimod exposure on liver morphology in mice. Male C57Bl6/J mice were exposed to ethanol (5 g/kg; i.g.) for 10 days. 24 hours after the last ethanol dose, some mice were exposed to the TLR7 agonist imiquimod (2.5 mg/kg i.p.) as described in *Materials and Methods*. Liver tissue was collected 2 h after imiquimod (or saline) administration. Formalin-foxed, paraffin embedded sections were cut at 5  $\mu$ m and mounted on glass slides. Sections were deparaffinized and stained with hematoxylin and eosin (H&E). Representative photomicrographs (original magnification, 200x) are shown.

## Supplemental Figure 2

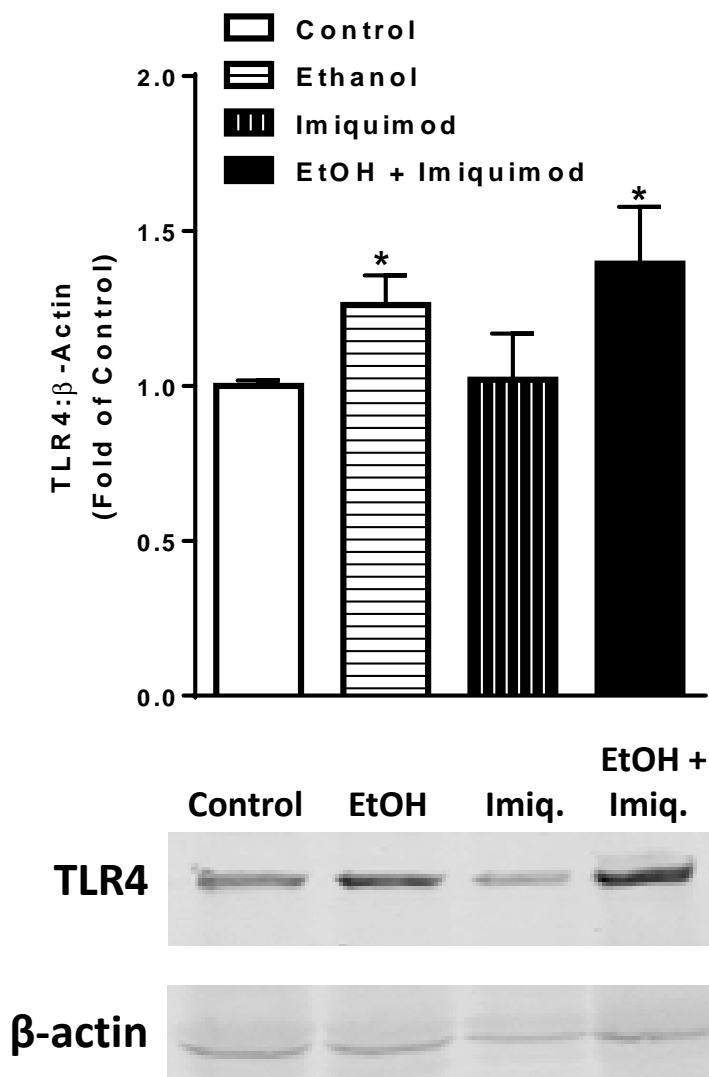

Supplemental Figure 2. Effect of ethanol and imiquimod exposure on liver TLR4 protein expression in mice. Male C57Bl6/J mice were exposed to ethanol (5 g/kg; i.g.) for 10 days. 24 hours after the last ethanol dose, some mice were exposed to the TLR7 agonist imiquimod (2.5 mg/kg i.p.) as described in *Materials and Methods*. Liver tissue was collected 2 h after imiquimod (or saline) administration. Western blot was performed as described in *Materials and Methods*. Quantitative data are shown as fold of control. \* $p < 0.05$  compared to control.
